# Supplementary material for: Knowledge, Attitudes, Practices and Perceived Barriers Among Mental Health Professionals in Sudanese Psychiatric Hospitals Regarding COVID-19 Outbreak
Source: Research Square preprint supplement (doi:10.21203/rs.3.rs-1155614/v1), 2021-12-16
Supplement: Supplementary file 1 [file 9bc401cf6d1a61cc7d3b05bb.docx]

**Assessment of Knowledge, Attitudes and Practices of Mental Health Professionals and common perceived Barriers in Sudanese Psychiatric Hospitals regrading COVID-19 .**

Dear mental health professional,

The current Coronavirus disease (COVID-19) epidemic is devastating. It has been declared an "Emergency of International Concern" by the World Health Organization (WHO). The number of COVID-19 cases was consistently increasing around the world and in our country. As the health professional's knowledge is of utmost importance to prevent and control the spreading of COVID-19. In this regard, we would likely to study and assess the level of knowledge, attitude, and practice of mental health professionals about COVID-19, In addition to barriers facing them. This can provide a greater opportunity to understand the existing gaps about the COVID-19 and to scale up the interventional strategies. Thus, we invite you to participate in this short survey and provide your valuable opinion regarding COVID-19.

This survey constitutes 31 Questions that are focused on investigating the various domains of knowledge and perception about COVID-19. We invite you to provide honest responses to the questions provided.

By clicking the below link, you agree to participate voluntarily in this survey and given your consent to use your anonymous data for research.

You may exit the survey at any stage, and no compensation will be provided.

If you have any further queries, please contact [fajr.hashim@gmail.com](mailto:fajr.hashim@gmail.com)

| Q1: What is your gender?   - Male (1) - Female (2)   Q2: What is your age? (years)   - --------   Q3: Marital status:   - Single - Married - divorced - Widower | Q4 What is your profession?   - Psychiatrists1 - Psychologists2 - Social workers3 - Psychiatric nurses4   Q5: Experiences years:   - ≤ 1 - 2-5 - 6-10 - ≥11   Q6: Hospital you work in :   - Tigani Almahi - Alidressi - Taha Baashar |
| --- | --- |

| **Sociodemographic status** |
| --- |

| **Knowledge of Mental Health Professionals regarding COVID-19** |
| --- |

Q7: Most used Sources of information of COVID-19 (SAR-COV-19) outbreak in Sudan as global emergency and Health Concern? **(Check the most used resources only)**

| News, Media (TV, Radio, newspapers etc.., ) |  |
| --- | --- |
| Social media (Facebook, Twitter, WhatsApp, YouTube, Instagram, Snapchat…) |  |
| Scientific Journals |  |
| Colleagues/discussions |  |
| lectures |  |

|  | Correct | Incorrect |
| --- | --- | --- |
| Q8)Special caution must be taken if a person presents with Fever, cough and Difficulty breathing? |  |  |
| Q9)COVID19 patients develop severe acute respiratory illness? |  |  |
| Q10)In epidemics, meat products can be safely consumed if these items get well cooked and prepared? |  |  |
| Q11)COVID-19 is a viral Infection? |  |  |
| Q12)Washing hands vigorously (soap/water) for 20s? |  |  |
| Q13)Influenza vaccine also gives protection from COVID-19? |  |  |
| Q14)Should the nose and mouth be covered when coughing or sneezing? |  |  |
| Q15)Psychiatric and neuropsychiatric patients are more susceptible for having complications from COVID-19? |  |  |
| Q16)Antibiotic is the first line treatment? |  |  |
| Q17)The main source of COVID-19 may be plant? |  |  |
| Q18)Polymerase Chain reaction can be used as diagnostic test for COVID-19? |  |  |
| Q19)Vaccination of Coronavirus is Available? |  |  |
| Q20)Incubation period of COVID-19 is 2-14 days? |  |  |
| 21)Is the disease transmitted only from people with symptoms? |  |  |
| 22) Can the disease be transmitted for a distance of more than two meters? |  |  |
| 23) Does the medical (surgical) mask protect against the virus? |  |  |

| **Attitude of Mental Health Professionals regarding COVID-19** |
| --- |

|  | Always | Most of the time | Sometime | Occasionally | Rarely |
| --- | --- | --- | --- | --- | --- |
| Q24)Level of your fear of COVID-19? |  |  |  |  |  |
| Q25) Would you like to take a corona virus vaccine if the vaccine is provided? |  |  |  |  |  |
| Q26)Willingness to care for the psychiatric patients suffering from the COVID-19? |  |  |  |  |  |

| **Practice of Mental Health professionals regarding COVID-19** |
| --- |

|  | Always | Most of the time | Sometimes | Occasionally | Rarely |
| --- | --- | --- | --- | --- | --- |
| Q27)During outbreak ,whether maintained quarantine with family ? |  |  |  |  |  |
| Q28)Apply WHO’s “My 5 Moments of Hand Hygiene”  before touching any patient, |  |  |  |  |  |
| before any clean or aseptic |  |  |  |  |  |
| , after exposure to body fluid |  |  |  |  |  |
| after touching a patient |  |  |  |  |  |
| after touching a patient surrounding |  |  |  |  |  |
| Q29)Do you wear personal protection equipment when dealing with all patients? |  |  |  |  |  |
| Q30)Do you wear personal protection equipment when dealing with patients suffering from respiratory symptoms? |  |  |  |  |  |
| Q31What protection do you wear:  Medical mask |  |  |  |  |  |
| Fabric Mask |  |  |  |  |  |
| N95 Mask |  |  |  |  |  |
| Gloves |  |  |  |  |  |
| Face Shield |  |  |  |  |  |
| Medical gown |  |  |  |  |  |

| **Barriers perceived by Mental Health professionals** |
| --- |

|  | Strongly agree | Agree | undecided | Disagree | Strongly disagree |
| --- | --- | --- | --- | --- | --- |
| Q25)Less commitment of mental health professionals to the policies and procedures? |  |  |  |  |  |
| Q26)Insufficient training in infection control measurement? |  |  |  |  |  |
| Q27)Overcrowding in psychiatric patients’ room is also a barrier in infection control practice ?? |  |  |  |  |  |
| Q28)Lack of policy procedures of infection control practice? |  |  |  |  |  |
| Q29)Limitation of infection control material? |  |  |  |  |  |
| Q30)Not wearing a mask while examine or contact with the patient? |  |  |  |  |  |
| Q31)No hand washing after examining or contact with the patient? |  |  |  |  |  |
| Lack of hand washing basins in the wards offices and lounges? |  |  |  |  |  |
| Lack of water, soap and alcohol (sterilizers)? |  |  |  |  |  |
| lack of gloves and masks? |  |  |  |  |  |
| lack of isolation rooms? |  |  |  |  |  |
| Lack of a clear medical pathway to deal with suspected and confirmed cases? |  |  |  |  |  |
| lack of an official specialized in infection control? |  |  |  |  |  |

Thank you
